# Supplementary material
Source: publisher figshare collection journal article supplement (https://gsajournals.figshare.com/articles/dataset/_/9478253)
Supplement: Supplementary file 1 [file 2]

## Sheet: Table S1
Table S1 784 barley landraces after removing 19 accessions from Poets et al., 2016
Accession_ID	Country	Latitude	Longitude	Elevation	Habit	Row_number
CIho00497	Egypt	27.065	30.065	183	S	6
CIho01458	Iraq	33.413	44.713	37	S	6
CIho01461	Iraq	33.413	44.713	37	S	6
CIho01468	Iraq	33.413	44.713	37	S	6
CIho01604	Ethiopia	8.071	38.071	2731	S	6
CIho02266	Uzbekistan	39.918	67.202	1374	W	6
CIho02337	Iraq	33.113	44.113	39	S	6
CIho02339	Iraq	33.113	44.113	39	S	6
CIho02479	Algeria	36.029	0.176	5	W	6
CIho03549	Algeria	33.022	6.022	80	F	6
CIho03556	Egypt	28.166	30.816	116	S	6
CIho03576	Egypt	31.571	25.177	17	S	2
CIho03581	Egypt	31.571	25.177	17	S	6
CIho03642	Egypt	30.947	29.632	18	S	6
CIho03694	Egypt	26.133	34.166	79	S	2
CIho03709	Egypt	31.049	29.833	2	S	6
CIho03734	Egypt	31.05	29.833	4	S	6
CIho03826	India	34.304	74.454	1587	W	6
CIho03853	India	34.338	74.888	2666	W	6
CIho03865	India	34.338	74.888	2666	W	6
CIho03886	India	34.321	75.105	4190	W	6
CIho04049	Mongolia	46.76	96.56	1770	S	6
CIho04050	Mongolia	46.326	95.393	1124	S	6
CIho04056	Mongolia	46.143	105.143	1362	S	6
CIho04063	Mongolia	46.76	96.56	1770	S	6
CIho04064	Mongolia	46.76	96.56	1770	S	6
CIho04069	Mongolia	46.66	96.477	1814	S	6
CIho04074	Mongolia	46.76	96.56	1770	S	6
CIho04083	Mongolia	46.794	96.611	1942	S	6
CIho04095	Georgia	41.805	44.871	620	S	6
CIho04144	Afghanistan	34.933	68.483	2263	S	6
CIho04159	Afghanistan	34.45	68.784	2261	S	6
CIho04176	Afghanistan	35.067	67.667	2904	S	6
CIho04184	Afghanistan	35.734	69.534	3960	S	6
CIho04188	Afghanistan	34.529	69.173	1798	S	6
CIho06294	Turkey	38.561	38.511	1123	S	6
CIho06601	Afghanistan	34.951	70.068	1638		6
CIho06702	Georgia	42.088	43.588	905	W	6
CIho06721	Egypt	30.074	31.277	22	S	6
CIho06950	Iran	32.109	53.109	1726	S	6
CIho06952	Iran	32.776	51.742	1556	S	6
CIho10058	Portugal	39.674	-7.826	264	W	6
CIho10549	Syria	35.204	38.204	519	S	2
CIho10550	Syria	35.204	38.204	519	S	NA
CIho11688	Afghanistan	34.868	68.001	2596	S	6
CIho11709	Ethiopia	7.905	36.738	1493	S	6
CIho11757	Japan	35.807	139.875	6	W	6
CIho11812	Ethiopia	8.072	38.072	2716	S	6
CIho11849	Ethiopia	8.072	38.072	2716	S	6
CIho13141	Ethiopia	8.072	38.072	2716	S	2
CIho13353	Ethiopia	12.672	37.539	2396	S	2
CIho13737	Ethiopia	9.389	42.189	1936	S	6
CIho13742	Eritrea	15.403	39.003	1827	S	6
CIho13743	Eritrea	15.403	39.003	1827	S	6
CIho13745	Eritrea	15.403	39.003	1827	S	6
CIho14051	Algeria	33.106	6.072	68	W	6
CIho14052	Algeria	34.856	5.739	110	S	6
CIho14053	Algeria	34.856	5.739	110	S	6
CIho14054	Algeria	33.023	6.023	84	S	6
CIho14055	Algeria	33.023	6.023	84	S	6
CIho14059	Algeria	34.656	5.889	17	S	6
CIho14124	Ethiopia	11.206	39.706	2558	S	6
CIho14151	Mongolia	46.144	105.144	1363	S	6
CIho14158	Mongolia	46.144	105.144	1363	S	6
CIho14216	Mongolia	46.144	105.144	1363	S	6
CIho14219	Mongolia	46.144	105.144	1363	S	6
CIho14222	Mongolia	46.145	105.145	1367	S	6
CIho14228	Mongolia	46.145	105.145	1367	S	6
CIho14234	Mongolia	46.145	105.145	1367	S	6
CIho14239	Mongolia	46.145	105.145	1367	S	6
CIho14250	Afghanistan	36.835	70.518	2446	S	2
CIho14255	Afghanistan	35.118	69.301	1575	S	6
CIho14258	Afghanistan	30.502	62.002	536	S	6
CIho14260	Afghanistan	33.302	62.135	1075	S	6
CIho14268	China	39.958	116.475	38	S	6
CIho14291	China	30.708	104.108	505	S	6
CIho14302	Armenia	40.194	44.51	1060	S	2
CIho14326	Azerbaijan	40.06	47.06	205	W	6
CIho14327	Azerbaijan	40.048	47.048	221	W	6
CIho14328	Azerbaijan	40.065	47.065	199	W	6
CIho14332	Azerbaijan	40.108	47.108	148	W	6
CIho14333	Azerbaijan	40.102	47.102	153	S	2
CIho14334	Azerbaijan	40.118	47.118	127	S	2
CIho14341	Azerbaijan	40.077	47.077	187	W	6
CIho14344	Azerbaijan	40.045	47.045	227	S	6
CIho14345	Azerbaijan	40.108	47.108	148	S	2
CIho14391	Armenia	40.011	45.011	2050	S	2
CIho14394	Armenia	40.011	45.011	2050	S	2
CIho14395	Armenia	40.011	45.011	2050	S	2
CIho14401	Myanmar	22.15	98.15	1024	W	6
CIho14880	Eritrea	15.403	39.003	1827	S	6
CIho14881	Eritrea	15.403	39.003	1827	S	6
CIho14883	Eritrea	15.403	39.003	1827	S	6
CIho14978	Ethiopia	13.722	39.639	2106	S	2
CIho15279	Tunisia	36.025	9.675	471	S	6
CIho15282	Tunisia	36.025	9.675	471	S	6
CIho15286	Tunisia	37.058	10.142	0	S	6
CIho15288	Tunisia	37.059	10.142	0	S	6
CIho15290	Tunisia	37.059	10.142	0	S	6
CIho15291	Tunisia	37.059	10.142	0	S	6
CIho15299	Tunisia	33.826	9.126	25	S	6
CIho15304	Tunisia	33.742	9.026	88	S	6
CIho15309	Tunisia	33.742	9.026	88	S	6
CIho15310	Tunisia	33.809	9.126	31	S	6
CIho15311	Tunisia	33.809	9.126	31	S	6
CIho15313	Tunisia	33.809	9.126	31	S	2
CIho15326	Tunisia	33.793	9.059	38	S	6
CIho15336	Tunisia	33.693	9.21	170	S	6
CIho15339	Tunisia	33.943	9.026	25	S	6
CIho15349	Tunisia	33.993	9.06	27	S	6
CIho15350	Tunisia	33.993	9.06	27	S	6
CIho15355	Tunisia	34.21	9.21	160	S	6
CIho15362	Tunisia	37.262	10.059	74	S	6
CIho15364	Tunisia	34.227	8.46	100	S	6
CIho15365	Tunisia	34.194	8.377	69	S	6
PI005873	Germany	50.042	10.175	223	S	2
PI024497	Turkmenistan	37.833	62.383	219	W	6
PI026179	Libya	25.135	17.135	422	S	6
PI027933	Georgia	41.805	44.872	612	W	6
PI029004	Turkmenistan	37.847	62.05	218	S	6
PI030842	India	27.355	80.855	134	S	6
PI035051	Uzbekistan	40.735	71.885	424	S	2
PI038484	Syria	36.405	37.365	544	W	2
PI038485	Syria	36.405	37.365	544	W	2
PI039368	India	26.089	85.789	51	S	6
PI039590	Algeria	35.423	0.173	701	S	6
PI042888	Sudan	15.747	32.728	421	S	6
PI047541	Iran	32.109	53.109	1726	W	NA
PI048641	Iran	32.109	53.109	1726	S	2
PI055526	Tunisia	34.211	9.211	161	S	6
PI057015	Iraq	33.113	44.113	39	S	2
PI057047	Algeria	33.107	6.073	72	W	6
PI057048	Algeria	33.107	6.073	72	W	6
PI057057	Algeria	34.857	5.74	115	S	6
PI057065	Algeria	36.757	3.057	30	S	2
PI057089	China	30.625	114.359	27	S	6
PI057095	Georgia	42.088	43.588	905	S	2
PI057097	Georgia	42.088	43.588	905	W	6
PI057098	Georgia	42.088	43.588	905	W	6
PI057099	Georgia	42.089	43.589	929	S	2
PI057106	Georgia	42.089	43.589	929	W	6
PI057296	China	42.342	123.859	71	S	6
PI057752	Egypt	31.451	31.511	3	S	6
PI057958	Pakistan	31.58	73.246	189	S	6
PI058057	Spain	40.192	-3.808	620	W	6
PI060205	China	31.792	80.409	5053	S	NA
PI060663	Libya	32.89	13.286	6	S	6
PI060679	Egypt	30.083	31.283	23	S	NA
PI060694	Ethiopia	8.073	38.073	2750	S	NA
PI060701	Egypt	29.567	34.067	679	S	NA
PI061509	Armenia	40.194	44.511	1067	S	2
PI061510	Armenia	40.194	44.511	1067	S	NA
PI061576	Mongolia	46.145	105.145	1367	S	6
PI061589	Mongolia	46.146	105.146	1366	S	6
PI064004	Algeria	28.007	3.007	631	S	6
PI064022	Uzbekistan	41.517	69.468	584	S	6
PI068187	Azerbaijan	40.113	47.113	133	W	6
PI068189	Azerbaijan	40.111	47.111	136	W	NA
PI068193	Azerbaijan	40.11	47.11	144	W	6
PI068208	Azerbaijan	40.097	47.097	159	W	6
PI068209	Azerbaijan	40.101	47.101	154	W	6
PI068218	Azerbaijan	40.117	47.117	130	W	6
PI068226	Azerbaijan	40.026	47.026	250	W	6
PI069421	China	36.759	114.559	57	S	6
PI069563	China	45.792	126.692	121	S	6
PI070839	China	43.939	125.369	193	S	6
PI070853	China	42.843	126.193	338	S	6
PI073291	Armenia	40.011	45.011	2050	S	NA
PI073292	Armenia	40.011	45.011	2050	S	2
PI073296	Azerbaijan	40.085	47.085	179	W	6
PI073297	Azerbaijan	40.092	47.092	165	W	6
PI073299	Armenia	40.011	45.011	2050	S	6
PI073301	Armenia	40.011	45.011	2050	S	2
PI073303	Azerbaijan	40.118	47.118	127	W	6
PI073700	China	49.643	117.476	704	S	6
PI076280	Iraq	33.397	44.63	37	S	6
PI076281	Iraq	33.397	44.63	37	F	2
PI076284	Iraq	33.397	44.63	37	S	6
PI076285	Iraq	33.397	44.631	37	S	6
PI076286	Iraq	33.397	44.631	37	S	6
PI076290	Iraq	33.397	44.631	37	S	6
PI076291	Iraq	33.397	44.631	37	S	6
PI076294	Iraq	33.398	44.631	37	S	6
PI076296	Iraq	33.398	44.631	37	S	6
PI076514	Russian Federation	43.181	47.181	-19	W	6
PI078786	Georgia	42.089	43.589	929	W	6
PI080937	Japan	35.739	138.731	791	W	6
PI080938	Japan	36.673	138.239	350	W	6
PI083794	Korea North	40.578	129.028	266	S	6
PI084311	Uzbekistan	41.852	60.402	90	S	6
PI084312	Uzbekistan	43.419	59.919	52	S	6
PI084313	Uzbekistan	43.419	59.919	52	S	6
PI084314	Uzbekistan	42.103	60.653	294	S	6
PI087180	Korea South	36.13	127.83	428	S	6
PI087752	Korea South	36.648	126.93	223	W	6
PI087754	Korea South	35.88	127.38	399	W	6
PI087757	Korea South	35.88	127.38	399	W	6
PI087763	Korea South	35.88	127.38	399	W	6
PI087765	Korea South	35.88	127.38	399	S	6
PI087767	Korea South	35.88	127.38	399	W	6
PI087778	Korea South	35.591	128.344	171	W-S	6
PI087780	Korea North	39.162	125.882	265	S	NA
PI087782	Korea North	39.162	125.882	265	S	NA
PI087795	Korea South	35.88	127.38	399	W	6
PI087800	Korea South	36.464	128.881	147	S	6
PI087815	Korea South	36.464	128.881	147	W	NA
PI087835	Korea North	41.716	129.734	1	W-F	NA
PI087836	Korea North	39.162	125.883	277	S	6
PI087838	Korea North	39.162	125.883	277	S	NA
PI087839	Korea North	39.162	125.883	277	W	6
PI087840	Korea North	39.162	125.883	277	S	6
PI087841	Korea North	40.054	125.522	100	W-S	6
PI087842	Korea North	38.831	127.57	810	W	6
PI087844	Korea North	40.476	127.497	1738	S	6
PI094790	Georgia	42.089	43.589	929	S	2
PI094797	Armenia	40.062	44.512	935	S	2
PI094801	Russian Federation	45.481	41.081	144	F	2
PI094806	Former Soviet Union	42.082	45.082	1166	S	2
PI094834	Ukraine	50.21	36.471	161	S	2
PI094853	Azerbaijan	40.388	50.005	40	W	6
PI094856	Georgia	42.089	43.589	929	W	6
PI094875	Russian Federation	45.481	41.081	144	S	6
PI094886	Turkey	40.578	50.095	-29	S	6
PI094919	Ukraine	50.2	36.472	178	S	6
PI117347	Turkey	38.083	32.696	1003	S	2
PI125321	Afghanistan	33.002	66.002	2194	S	6
PI134636	Afghanistan	34.419	69.385	2083	S	6
PI135758	Afghanistan	35.935	66.419	1249	S	6
PI135761	Afghanistan	34.552	65.152	2335	S	2
PI138698	Iran	27.426	56.393	108	S	6
PI138699	Iran	30.393	57.188	1954	S	6
PI138706	Iran	30.493	57.659	458	S	6
PI138709	Iran	29.21	58.46	958	S	6
PI138710	Iran	32.11	53.11	1729	S	6
PI138711	Iran	32.11	53.11	1729	S	6
PI138722	Iran	31.143	52.943	2073	W	6
PI138726	Iran	29.11	53.11	1886	S	6
PI140277	Afghanistan	33.002	66.002	2194	S	6
PI140278	Afghanistan	34.819	67.819	2516	S	6
PI141423	Iran	33.577	49.177	1700	S	2
PI141441	Iran	36.327	57.81	1580	S	6
PI151787	Ethiopia	8.073	38.073	2750	S	2
PI151795	Ethiopia	8.073	38.073	2750	S	6
PI155303	Yemen	15.755	47.755	710	S	2
PI164385	India	29.906	75.939	229	S	6
PI164744	India	15.456	75.272	597	S	6
PI165883	India	30.356	79.439	2146	S	6
PI166058	India	27.356	80.856	133	S	6
PI166060	India	27.356	80.856	133	S	6
PI166078	India	30.356	79.439	2146		6
PI167271	Turkey	37.212	35.512	266	S	6
PI168328	Turkey	39.795	27.229	235	S	6
PI168367	Turkey	39.312	33.295	882	S	2
PI173518	Turkey	41.596	35.777	41	S	6
PI173577	Turkey	38.579	34.229	1268	S	6
PI176004	India	30.139	80.289	3488	S	6
PI176010	India	30.14	80.29	3496	S	2
PI176021	India	29.94	79.606	1260	S	6
PI176035	India	29.94	79.606	1260	S	6
PI176042	India	29.94	79.607	1238	S	6
PI176061	India	29.94	79.607	1238	W	6
PI176071	Nepal	28.151	84.151	1135	W	6
PI176112	India	30.49	78.59	1907	S	6
PI176113	India	30.607	78.774	2865	S	6
PI176118	India	30.607	78.774	2865	S	6
PI176129	India	30.607	78.774	2865	S	6
PI176144	India	30.607	78.774	2865	S	6
PI176162	India	30.607	78.774	2865	S	6
PI178283	Turkey	38.113	34.779	1349	S	6
PI178285	Turkey	37.029	35.963	137	S	6
PI178332	Turkey	41.363	28.013	226	S	6
PI178594	Turkey	38.563	38.53	1131	S	2
PI178609	Turkey	40.866	36.046	1194	S	6
PI178636	Iraq	33.415	44.715	38	S	2
PI178637	Iraq	33.415	44.715	38	S	6
PI181102	India	32.691	77.107	5333	S	6
PI181108	India	24.941	72.857	268	S	6
PI181113	India	24.024	72.491	187	S	6
PI182373	Turkey	40.496	40.396	2264	S	2
PI182602	Japan	37.968	139.17	3	W	6
PI182659	Syria	35.204	38.204	519	S	2
PI182661	Lebanon	33.885	36.001	939	S	6
PI182662	Lebanon	33.885	36.001	939	S	2
PI182679	Syria	33.704	36.504	1086	S	6
PI182681	Syria	32.954	36.704	1000	S	2
PI182684	Syria	34.938	36.921	434	S	6
PI182687	Syria	35.338	36.955	434	S	2
PI182691	Syria	36.405	37.371	545	S	2
PI182693	Syria	36.705	41.205	334	S	2
PI182694	Syria	36.405	37.372	545	S	2
PI182726	Turkey	40.147	44.247	855	S	6
PI183631	Austria	47.567	16.1	464	W	2
PI183636	Austria	48.417	16.234	221	W	6
PI184103	Montenegro	43.296	19.246	1025	S	2
PI184112	Montenegro	43.496	19.496	845	S	2
PI186125	Korea South	37.132	127.632	60	S	6
PI186130	Korea South	37.132	127.632	60	W	6
PI186134	Korea South	37.132	127.632	60	W	6
PI186424	Ethiopia	8.073	38.073	2750	S	2
PI190271	Japan	34.785	134.058	58	W	6
PI190771	Japan	33.123	131.123	686	S	6
PI190786	Korea North	40.129	127.129	1025	S	6
PI190787	Korea North	40.129	127.129	1025	S	6
PI190790	Korea North	40.129	127.129	1025	S	6
PI190824	Korea South	35.594	128.346	160	S	6
PI190852	Korea South	37.133	127.633	62	S	6
PI193799	Ethiopia	9.106	38.773	3041	S	6
PI194951	Ethiopia	12.673	37.54	2357	S	6
PI194952	Ethiopia	12.673	37.54	2357	S	6
PI198734	Afghanistan	33.552	68.419	2182	S	6
PI217948	Pakistan	34.064	70.264	2334	W	6
PI220659	Afghanistan	34.986	68.736	2026	S	6
PI220660	Afghanistan	35.753	69.003	2201	W	6
PI223143	Jordan	31.125	36.125	888	S	6
PI223446	Afghanistan	37.119	70.569	1191	S	6
PI223509	Afghanistan	34.419	70.453	579	S	6
PI223879	Afghanistan	36.003	69.753	2351	S	6
PI225136	Iran	32.11	53.11	1729	W	NA
PI226639	Iran	29.744	51.844	2293	S	2
PI227449	Iran	29.11	53.11	1886	S	2
PI233834	Jordan	31.126	36.126	887	S	6
PI235186	Libya	25.135	17.135	422	S	6
PI243581	Iran	38.344	48.411	1310	W	6
PI243587	Iran	35.844	50.494	1150	W	6
PI243588	Iran	30.394	57.19	1960	S	6
PI243607	Iran	36.328	57.811	1632	S	6
PI243609	Iran	37.578	57.428	917	W	6
PI244041	Yemen	14.222	44.439	2753	S	2
PI244785	Afghanistan	34.52	69.186	1797	S	6
PI244791	Afghanistan	35.003	69.17	1548	S	6
PI244807	Iran	36.945	54.595	11	W	6
PI244823	Pakistan	36.164	75.164	5060	S	6
PI244826	Pakistan	35.464	75.78	4313	S	6
PI247928	Cyprus	35.055	33.055	443	S	6
PI250365	Pakistan	30.164	70.164	851	S	6
PI250366	Pakistan	33.681	74.081	1079	W	6
PI250775	Afghanistan	31.603	65.703	996	S	6
PI250778	Afghanistan	31.603	65.703	996	S	6
PI250861	Iran	36.411	59.711	1024	S	2
PI253313	Bosnia and Herzegovina	44.428	17.111	524	S	2
PI253938	Iraq	35.665	45.548	907	S	2
PI264210	Libya	25.136	17.136	424	S	6
PI264251	Turkey	40.133	33.068	1019	S	2
PI264864	Italy	44.586	10.036	807	S	2
PI264870	Turkey	39.247	39.73	2003	S	2
PI264888	Italy	37.436	15.07	7	S	6
PI264890	Italy	37.753	14.887	1224	S	2
PI264891	Italy	41.253	13.987	440	S	6
PI264894	Italy	38.569	16.564	19	S	6
PI264897	Greece	35.517	23.925	16	S	6
PI264903	Greece	36.418	25.469	28	S	6
PI264904	Greece	36.312	27.929	73	S	6
PI264906	Greece	36.279	27.929	575	S	6
PI264909	Greece	40.946	25.846	111	S	6
PI264911	Greece	40.628	23.767	7	S	6
PI264912	Greece	40.363	23.529	400	S	6
PI264916	Croatia	42.82	17.97	595	W	6
PI264921	Croatia	43.737	16.153	350	S	6
PI264922	Croatia	45.47	14.953	581	S	6
PI264923	Croatia	45.287	13.987	337	S	6
PI264926	Italy	41.254	13.987	437	S	2
PI268241	Iran	29.728	52.345	2054	S	2
PI268250	Iran	32.795	47.378	1158	S	6
PI268255	Iran	30.412	51.595	2085	S	2
PI268256	Iran	30.412	51.595	2085	S	2
PI269899	Pakistan	33.531	70.714	1136	S	6
PI269912	Pakistan	36.247	72.214	1960	S	6
PI273905	Ethiopia	7.907	36.74	1524	S	6
PI277393	Ethiopia	9.14	38.573	2729	S	6
PI282616	Israel	31.617	34.867	233	S	6
PI283397	Armenia	40.012	45.012	2111	S	2
PI283433	Cyprus	35.055	33.055	443	S	6
PI283441	Ethiopia	8.073	38.073	2750	S	2
PI285118	Eritrea	15.07	39.07	2113	S	2
PI285124	Ethiopia	9.757	39.607	2698	S	6
PI286388	Eritrea	15.404	39.004	1829	S	2
PI286389	Eritrea	15.07	39.07	2113	S	2
PI289811	Iran	32.295	48.345	92	S	6
PI290346	Ethiopia	8.074	38.074	2733	S	6
PI295442	Ethiopia	9.424	38.841	2513	S	2
PI295581	Ethiopia	7.274	38.674	2039	S	6
PI296185	Yemen	15.755	47.755	710	S	2
PI296192	Tajikistan	39.207	71.207	1769	S	6
PI296453	Eritrea	15.404	39.004	1829	S	2
PI296455	Ethiopia	13.574	39.541	2288	S	2
PI296457	Ethiopia	14.274	39.491	2433	S	2
PI296459	Eritrea	14.754	39.487	2037	S	6
PI296460	Eritrea	15.837	38.521	1368	S	6
PI296472	Ethiopia	8.074	38.074	2733	S	2
PI298708	Ethiopia	7.808	36.658	1761	S	6
PI298738	Ethiopia	9.858	38.758	1769	S	6
PI316801	Ethiopia	8.075	38.075	2758	S	2
PI316874	Ethiopia	8.075	38.075	2758	S	6
PI319867	Turkey	39.273	35.125	1251	S	6
PI327680	Ukraine	46.697	30.952	12	S	6
PI327701	Russian Federation	45.225	42.156	322	W	6
PI327702	Russian Federation	45.225	42.156	322	W	NA
PI327704	Russian Federation	45.225	42.156	322	S	2
PI327708	Russian Federation	45.225	42.156	322	W	6
PI327709	Russian Federation	45.226	42.156	326	W-S	6
PI327719	Ukraine	48.67	35.203	59	S	6
PI327724	Ukraine	49.776	25.825	345	S	6
PI327738	Russian Federation	45.232	39.155	30	W	6
PI327763	Russian Federation	45.226	42.156	326	W	6
PI327764	Russian Federation	45.226	42.156	326	W	6
PI327783	Russian Federation	45.226	42.157	325	W	6
PI327810	Russian Federation	43.683	43.683	330	W	6
PI327827	Azerbaijan	39.231	45.434	894	W	6
PI327830	Turkmenistan	40.417	60.237	150	W	6
PI327833	Uzbekistan	41.961	64.102	124	S	6
PI327836	Ukraine	48.67	35.203	59	W	6
PI327837	Armenia	39.795	45.295	1432	W	6
PI327838	Armenia	40.012	45.012	2111	NA	6
PI327840	Armenia	40.879	45.145	675	W	6
PI327842	Armenia	40.879	45.145	675	W	6
PI327849	Turkmenistan	40.227	60.227	157	W	6
PI327854	Turkmenistan	40.247	60.247	161	W	6
PI327857	Turkmenistan	38.468	59.973	126	W	6
PI327858	Turkmenistan	40.278	60.328	157	W	6
PI327860	Turkmenistan	40.298	60.348	154	S	6
PI327861	Uzbekistan	41.961	64.102	124	S	6
PI327862	Uzbekistan	39.907	67.213	1326	W	6
PI327863	Uzbekistan	39.908	67.213	1305	W	6
PI327864	Uzbekistan	40.028	64.682	250	W	6
PI327866	Armenia	40.012	45.012	2111	W	6
PI327868	Turkmenistan	38.468	59.968	124	S	6
PI327869	Turkmenistan	40.308	60.358	150	S	6
PI327870	Turkmenistan	40.328	60.368	145	S	6
PI327882	Turkmenistan	40.338	60.378	147	S	2
PI327907	Bulgaria	43.032	25.032	238	S	6
PI328152	Bulgaria	43.033	25.033	235	S	6
PI328154	Bulgaria	43.033	25.033	235	S	6
PI328155	Bulgaria	43.033	25.033	235	S	6
PI328162	Bulgaria	43.033	25.033	235	S	6
PI328171	Turkey	41.447	35.697	446	S	2
PI328200	Turkey	39.273	35.125	1251	S	6
PI328207	Turkey	39.273	35.126	1258	S	6
PI328208	Turkey	39.273	35.126	1258	S	6
PI328244	Turkey	39.273	35.126	1258	S	6
PI328253	Turkey	39.273	35.126	1258	S	6
PI328279	Turkey	39.273	35.126	1258	S	6
PI328299	Turkey	38.065	27.465	14	S	6
PI328327	Turkey	39.864	28.101	234	S	6
PI328336	Turkey	39.274	35.126	1259	S	2
PI328388	Greece	35.122	25.858	120	S	6
PI328409	Greece	36.796	22.479	189	S	6
PI328417	Greece	38.03	23.63	135	S	6
PI328484	Greece	35.252	24.991	371	S	6
PI328485	Greece	35.113	26.196	542	S	6
PI328486	Greece	35.518	23.874	15	S	6
PI328498	Greece	37.697	22.147	1093	S	6
PI328520	Greece	39.097	22.097	584	S	6
PI328577	Greece	36.847	22.664	9	S	6
PI328578	Greece	35.257	26.251	19	S	6
PI328632	Greece	35.464	23.73	427	S	6
PI328637	Greece	37.347	22.647	761	S	2
PI328639	Greece	39.097	22.097	584	S	6
PI328728	Afghanistan	33.004	66.004	2129	S	6
PI328729	Afghanistan	33.004	66.004	2129	S	6
PI328787	Greece	35.308	25.566	46	S	6
PI328858	Germany	51.594	10.594	300	W	6
PI328907	Turkey	39.274	35.126	1259	S	2
PI328924	Italy	38.22	15.77	660	S	6
PI328945	Italy	38.221	15.771	686	S	6
PI328976	Ethiopia	8.075	38.075	2758	S	6
PI329000	Ethiopia	8.075	38.075	2758	S	6
PI329032	Greece	37.014	22.531	267	S	2
PI329042	Greece	37.248	22.064	630	S	6
PI329043	Greece	39.098	22.098	576	F	6
PI329114	Greece	38.055	23.09	84	F	6
PI331217	Eritrea	15.404	39.004	1829	S	2
PI331878	Italy	38.221	15.771	686	S	2
PI331895	Afghanistan	33.004	66.004	2129	S	6
PI331912	Italy	42.954	12.954	1000	S	6
PI342031	Turkey	38.565	38.532	1162	S	6
PI342136	Turkey	38.972	30.758	1443	S	2
PI342139	Turkey	38.889	29.621	1261	S	2
PI342198	Turkey	38.889	29.621	1261	S	2
PI342219	Turkey	39.639	30.199	886	S	2
PI342270	Turkey	39.65	30.2	886	S	2
PI342283	Turkey	39.66	30.201	886	S	2
PI342329	Turkey	39.67	30.202	955	S	2
PI342331	Turkey	39.68	30.203	976	S	2
PI344865	Serbia	45.005	20.646	76	S	6
PI344867	Serbia	43.452	21.802	219	S	6
PI344871	Macedonia	42.253	21.836	421	S	6
PI344874	Macedonia	41.937	21.037	741	S	6
PI344885	Serbia	43.536	19.869	1106	S	2
PI344886	Serbia	43.536	19.869	1106	S	2
PI344889	Macedonia	41.903	21.887	381	S	6
PI344903	Serbia	45.005	20.646	76	S	2
PI344920	Bosnia and Herzegovina	43.078	18.611	979	S	2
PI344926	Bosnia and Herzegovina	43.328	18.778	1510	S	2
PI344928	Bosnia and Herzegovina	43.395	18.812	1252	S	2
PI344930	Bosnia and Herzegovina	43.528	18.795	495	S	2
PI344932	Bosnia and Herzegovina	43.445	18.912	1162	S	2
PI344936	Bosnia and Herzegovina	43.529	18.795	453	S	2
PI344940	Bosnia and Herzegovina	43.579	19.095	1271	S	2
PI344941	Bosnia and Herzegovina	43.579	19.096	1283	S	2
PI344942	Bosnia and Herzegovina	43.579	19.096	1283	S	2
PI344943	Bosnia and Herzegovina	43.779	18.796	786	S	2
PI344944	Montenegro	43.53	19.48	939	S	2
PI344956	Montenegro	43.297	19.263	996	S	2
PI344958	Montenegro	43.297	19.263	996	S	2
PI349896	Serbia	45.005	20.646	76	S	2
PI349907	Bosnia and Herzegovina	43.779	19.479	550	S	2
PI350713	Austria	47.035	13.635	1801	S	2
PI350715	Austria	47.168	13.518	1789	S	2
PI350717	Austria	47.302	12.668	1395	F	6
PI350725	Austria	47.068	10.635	1408	S	2
PI356264	Ethiopia	8.075	38.075	2758	S	6
PI356333	Ethiopia	8.075	38.075	2758	S	6
PI356505	Ethiopia	8.075	38.075	2758	S	6
PI356580	Ethiopia	8.075	38.075	2758	S	6
PI356666	Ethiopia	8.075	38.075	2758	F	6
PI356672	Morocco	32.148	-4.852	1536	S	6
PI356696	Morocco	32.148	-4.852	1536	S	6
PI356711	Morocco	32.148	-4.852	1536	S	6
PI356713	Morocco	32.149	-4.852	1538	S	6
PI356715	Morocco	32.149	-4.851	1543	S	6
PI356718	Morocco	32.149	-4.851	1543	S	6
PI356719	Morocco	32.149	-4.851	1543	S	6
PI356732	Morocco	32.149	-4.851	1543	S	6
PI356734	Morocco	32.149	-4.851	1543	S	6
PI356737	Morocco	32.149	-4.851	1543	W	6
PI356741	Morocco	32.149	-4.851	1543	S	6
PI356742	Morocco	32.149	-4.851	1543	S	6
PI356755	Morocco	32.15	-4.85	1545	S	6
PI356759	Morocco	32.15	-4.85	1545	S	6
PI356763	Morocco	32.15	-4.85	1545	S	6
PI356771	Morocco	32.15	-4.85	1545	S	6
PI356775	Morocco	32.15	-4.85	1545	S	6
PI362381	Serbia	44.003	22.136	304	S	6
PI366439	Afghanistan	34.554	65.787	2449	S	2
PI366450	Afghanistan	34.871	63.087	1297	S	6
PI366453	Afghanistan	33.771	62.254	1482	S	6
PI366478	Afghanistan	36.688	67.838	402	W	6
PI370782	Switzerland	47	9.416	1588	S	2
PI370821	Switzerland	47	9.416	1588	S	2
PI370833	Germany	51.594	10.594	300	F	6
PI370852	Switzerland	47.2	8.214	763	S	2
PI370862	Switzerland	46.817	10.567	1985	F	2
PI370867	Switzerland	46.517	8.15	3318	S	2
PI370869	Switzerland	46.517	8.15	3318	S	2
PI370963	Switzerland	46.567	8.283	2138	S	2
PI370966	Switzerland	46.617	8.367	2851	S	2
PI370970	Switzerland	46.617	8.367	2851	S	6
PI370983	Switzerland	47.201	8.215	768	S	2
PI370994	Switzerland	46.684	8.467	2787	S	2
PI371017	Switzerland	46.684	8.484	2359	S	2
PI371056	Switzerland	46.484	7.617	2121	S	2
PI371069	Switzerland	46.368	8.001	1420	S	2
PI371079	Switzerland	46.551	8.168	2510	S	2
PI371100	Switzerland	46.568	8.284	2261	S	2
PI371102	Switzerland	46.568	8.284	2261	S	2
PI371105	Switzerland	46.585	8.285	2211	S	2
PI371111	Switzerland	46.401	7.585	2297	S	2
PI371149	Switzerland	46.318	7.701	1072	S	2
PI371156	Switzerland	46.402	7.785	1375	S	6
PI371172	Switzerland	46.385	7.802	2518	S	2
PI371196	Switzerland	46.352	8.119	2203	S	2
PI371217	Switzerland	46.369	8.002	1362	S	2
PI371245	Switzerland	46.969	9.652	810	S	2
PI371248	Switzerland	46.935	9.602	1141	S	2
PI371275	Switzerland	46.986	9.319	1072	S	2
PI371298	Switzerland	46.486	7.652	1856	S	2
PI371320	Switzerland	46.952	8.886	2143	S	2
PI371323	Switzerland	46.886	9.069	2495	S	2
PI371327	Switzerland	46.869	9.436	2124	S	2
PI371335	Switzerland	46.853	9.053	2562	S	6
PI371338	Switzerland	46.853	9.053	2562	S	2
PI371377	Switzerland	46.97	10.353	2457	S	2
PI371384	Switzerland	47.153	10.603	1171	S	2
PI371390	Switzerland	47.003	10.436	2512	S	2
PI371392	Switzerland	47.003	10.437	2509	S	2
PI371441	Switzerland	46.853	9.787	2109	S	2
PI371477	Switzerland	46.837	9.62	1211	S	2
PI371490	Switzerland	46.954	9.304	2226	S	2
PI372077	Armenia	40.962	44.662	1243	S	2
PI374413	Macedonia	42.32	21.954	814	S	2
PI374420	Bosnia and Herzegovina	44.163	17.429	780	S	2
PI374421	Bosnia and Herzegovina	44.163	17.429	780	S	2
PI374423	Bosnia and Herzegovina	44.28	17.863	583	S	2
PI374424	Bosnia and Herzegovina	43.53	18.796	454	S	2
PI374429	Serbia	43.47	20.803	1570	S	2
PI374437	Serbia	43.47	20.803	1570	S	6
PI378216	Macedonia	41.137	20.937	1418	S	6
PI378218	Serbia	44.553	19.803	218	S	2
PI378224	Serbia	44.153	19.753	894	S	6
PI382275	Ethiopia	14.392	39.309	2016	S	2
PI382296	Ethiopia	14.059	39.659	2507	S	2
PI382343	Ethiopia	12.593	39.609	1687	S	2
PI382437	Ethiopia	8.493	39.459	1496	S	2
PI382506	Ethiopia	14.343	39.526	2164	S	2
PI382798	Ethiopia	12.793	37.509	1898	S	6
PI382860	Ethiopia	12.86	37.726	2724	S	6
PI382911	Ethiopia	14.343	39.543	2629	S	6
PI382982	Ethiopia	12.593	39.61	1685	S	6
PI383031	Ethiopia	8.76	38.31	2092	S	6
PI383136	Ethiopia	8.36	39.493	1636	S	6
PI386406	Eritrea	15.404	38.738	2129	S	2
PI386462	Ethiopia	14.244	38.977	2145	S	2
PI386524	Ethiopia	6.56	38.594	2527	S	2
PI386559	Ethiopia	11.927	38.094	2470	S	2
PI386601	Ethiopia	7.611	39.327	3331	S	6
PI386650	Ethiopia	13.227	37.977	2275	S	6
PI386723	Ethiopia	8.077	38.077	2754	S	6
PI386759	Ethiopia	8.078	38.078	2728	S	6
PI386838	Ethiopia	11.928	38.094	2484	S	6
PI386844	Ethiopia	14.178	38.578	1953	S	2
PI386940	Ethiopia	7.145	38.861	2666	S	6
PI387098	Ethiopia	8.995	38.728	2321	S	6
PI390302	Macedonia	41.354	21.337	599	S	6
PI390304	Macedonia	41.571	22.287	531	NA	6
PI390323	Macedonia	41.671	22.671	861	S	6
PI405744	Macedonia	41.871	21.888	439	S	6
PI405756	Macedonia	41.554	22.021	147	W	6
PI405762	Macedonia	41.638	22.021	351	W	6
PI405780	Macedonia	41.371	22.738	859	S	6
PI405792	Macedonia	42.021	22.321	1181	S	6
PI405802	Macedonia	42.288	22.155	1075	S	6
PI410437	Libya	32.889	13.286	6	S	6
PI410444	Pakistan	35.364	74.214	2768	S	6
PI410451	Pakistan	36.481	75.048	4116	S	6
PI410456	Pakistan	36.381	73.364	3245	S	6
PI410464	Pakistan	36.598	73.548	4418	S	6
PI410465	Pakistan	36.431	73.581	4245	S	6
PI410471	Pakistan	36.331	73.131	3879	S	6
PI410475	Pakistan	36.315	73.065	4785	S	6
PI410478	Pakistan	36.448	73.948	4103	S	6
PI410481	Pakistan	36.215	74.298	2308	S	6
PI410483	Pakistan	35.615	74.965	2907	S	6
PI410507	Pakistan	35.415	76.015	4165	S	6
PI410509	Pakistan	35.332	76.249	4720	S	6
PI410516	Pakistan	35.282	76.132	4557	S	6
PI410520	Pakistan	35.349	76.066	5135	S	6
PI410522	Pakistan	35.466	75.932	5270	S	6
PI410525	Pakistan	36.082	72.066	2552	S	6
PI415314	Macedonia	41.972	22.138	621	S	6
PI415330	Macedonia	41.972	22.138	621	NA	6
PI415331	Macedonia	41.972	22.139	629	S	6
PI415348	Macedonia	41.972	22.139	629	S	6
PI415349	Macedonia	41.972	22.139	629	S	6
PI415362	Macedonia	41.972	22.139	629	W	6
PI415363	Macedonia	41.972	22.139	629	W	6
PI415365	Macedonia	41.972	22.139	629	S	6
PI420454	Macedonia	41.973	22.139	620	S	6
PI420459	Macedonia	41.973	22.139	620	S	6
PI420462	Macedonia	41.973	22.14	616	S	6
PI420463	Macedonia	41.973	22.14	616	S	6
PI420482	Macedonia	41.973	22.14	616	S	6
PI420922	Jordan	32.21	35.843	350	S	6
PI420923	Jordan	30.777	35.76	1158	S	2
PI422225	Yemen	15.605	44.455	2170	S	6
PI422226	Yemen	13.289	44.156	1924	S	2
PI422230	Yemen	15.756	47.756	706	S	2
PI422232	Yemen	15.606	44.456	2180	S	2
PI422233	Yemen	15.606	44.456	2180	S	2
PI429311	Yemen	13.823	44.289	1907	S	2
PI429312	Yemen	13.823	44.289	1907	S	2
PI429313	Yemen	15.773	44.156	2808	S	2
PI429314	Yemen	15.673	44.59	2309	S	6
PI429360	Iran	36.312	48.312	1700	S	2
PI429504	Nepal	27.384	87.234	469	S	6
PI429519	Nepal	27.418	87.134	626	S	6
PI429521	Nepal	27.535	87.551	2706	S	6
PI429526	Nepal	27.601	87.368	1469	S	6
PI429533	Nepal	27.718	87.385	2098	S	6
PI429546	Nepal	27.602	87.035	3262	S	6
PI429594	Nepal	27.735	86.602	5348	S	6
PI429883	India	34.341	76.191	4573	S	6
PI429947	India	32.141	76.941	4028	W	6
PI429995	India	29.858	80.391	2130	S	6
PI430743	Yemen	17.323	43.84	1784	S	6
PI430744	Yemen	16.257	44.44	1194	S	6
PI430745	Yemen	15.907	44.223	2230	S	6
PI434871	Algeria	28.007	3.007	631	S	6
PI467375	France	48.502	-2.581	59	S	2
PI467467	Austria	47.269	11.352	644	S	6
PI467486	Austria	47.702	14.269	755	S	2
PI467657	United Kingdom	52.385	-0.479	72	S	2
PI467684	Portugal	40.208	-8.208	311	S	6
PI467690	Portugal	40.292	-8.325	302	W	6
PI467691	Portugal	38.742	-7.724	308	S	6
PI467692	Portugal	39.676	-7.824	259	S	6
PI494169	Iran	38.192	46.404	1889	W	2
PI494175	Iran	32.562	48.462	392	W	2
PI513166	Pakistan	31.026	72.486	158	W-S	6
PI513167	Pakistan	30.633	72.616	155	W-S	6
PI513169	Pakistan	31.283	74.616	208	W	6
PI513195	Pakistan	25.433	63.633	57	W	6
PI513197	Pakistan	25.833	62.3	48	W	6
PI513200	Pakistan	28.645	65.81	1073	W	6
PI513205	Pakistan	30.7	67.2	1836	S	6
PI513226	Pakistan	36.167	75.167	5247	S	6
PI559494	Nepal	29.402	82.402	4594	S	6
PI559501	Nepal	29.335	82.519	4633	W	6
PI559516	Nepal	28.152	84.152	1171	NA	NA
PI559518	Nepal	28.152	84.152	1171	NA	NA
PI559519	Nepal	28.152	84.152	1171	W	NA
PI564595	Bhutan	27.275	89.442	3557	W	6
PI564602	Egypt	31.349	27.266	27	S	6
PI564603	Syria	33.338	36.722	595	W	2
PI564607	Syria	33.505	36.389	652	W	2
PI564613	Syria	36.839	40.839	383	W	2
PI564614	Syria	36.939	40.772	410	W	2
PI564616	Syria	36.906	41.006	396	W	2
PI564620	Syria	36.922	40.389	389	W	2
PI564621	Syria	35.222	37.072	496	W	2
PI564622	Syria	35.256	36.756	364	W	2
PI564627	Pakistan	30.717	66.867	1479	S	6
PI564637	Syria	35.256	36.439	176	S	6
PI564641	Syria	34.739	37.339	937	W	2
PI564643	Syria	34.439	37.539	544	NA	NA
PI564644	Syria	35.206	38.206	518	W	2
PI564647	Oman	24.506	56.609	0	S-W	6
PI564648	Oman	23.662	57.328	123	S	6
PI564649	Oman	23.329	57.495	430	S	6
PI564661	Oman	23.329	57.495	430	W	6
PI564662	Oman	23.329	57.329	1288	W	6
PI564663	Oman	23.329	57.329	1288	W	NA
PI564664	Oman	23.496	56.829	654	W	6
PI564666	Oman	23.746	56.696	769	S	6
PI564669	Oman	23.163	57.496	1915	W	6
PI564678	Syria	36.04	39.59	344	W	2
PI572573	Israel	32.118	35.185	400	S	6
PI573610	Armenia	40.013	45.013	2070	S	2
PI573659	Georgia	43.139	42.673	3953	S	2
PI573660	Georgia	43.123	42.906	3386	S	2
PI573661	Georgia	43.123	42.923	3731	S	2
PI573662	Georgia	43.14	42.89	3409	S	2
PI573663	Georgia	43.09	42.706	2715	S	2
PI573668	Georgia	43.14	42.823	3418	S	2
PI573675	Georgia	43.09	42.707	2698	S	2
PI573682	Georgia	42.723	45.19	2668	S	2
PI573687	Georgia	42.49	45.207	2256	S	2
PI573702	Georgia	42.024	44.824	941	S	2
PI573703	Georgia	41.807	43.074	1819	S	2
PI573760	Nepal	27.902	86.902	4982	S	6
PI573786	Nepal	27.569	86.236	2445	S	6
PI573792	Nepal	27.569	86.236	2445	W	6
PI573802	Nepal	27.986	86.403	4776	S	6
PI573817	Nepal	29.403	81.069	2709	W	6
PI573864	Nepal	28.736	83.486	5104	S	6
PI573926	Nepal	29.82	81.403	4079	W	6
PI573953	Nepal	29.653	80.736	2361	W	6
PI573967	Nepal	28.57	82.903	2669	W	6
PI573969	Nepal	28.57	82.903	2669	W	6
PI573977	Nepal	28.57	82.903	2669	W	6
PI573982	Nepal	28.904	82.737	4665	W	6
PI573985	Nepal	28.904	82.737	4665	S	6
PI574003	Nepal	29.654	81.654	2693	S	6
PI574033	Nepal	27.404	86.987	1424	W	6
PI574062	Nepal	27.904	86.904	5010	W	6
PI574067	Nepal	27.904	86.904	5010	W	6
PI574081	Nepal	28.988	82.404	5122	W	6
PI574085	Nepal	27.071	88.071	1881	W	6
PI574089	Nepal	27.071	88.071	1881	S	6
PI574091	Nepal	27.071	88.071	1881	S	2
PI574094	Nepal	27.071	88.071	1881	S	6
PI574292	Bhutan	27.559	90.192	3003	W	6
PI584785	Iraq	33.115	44.115	38	W	NA
PI584786	Iraq	33.115	44.115	38	S	6
PI584788	Iraq	33.115	44.115	38	W	NA
PI584959	China	26.591	117.889	278	S	6
PI584962	China	30.062	120.918	12	S	2
PI584963	China	36.103	103.839	1618	S	6
PI584971	China	36.047	96.047	4059	S	6
PI584973	China	42.616	85.503	3858	S	2
PI584974	China	42.616	85.503	3858	S	6
PI584975	China	39.047	116.047	15	F	6
PI584977	China	37.047	112.047	910	S	6
PI591876	Georgia	42.741	45.241	2178	S	6
PI606305	Saudi Arabia	18.418	42.702	1946	S	2
PI606311	Saudi Arabia	21.452	40.602	1433	S	2
PI611491	China	30.063	120.919	17	S	2
PI636056	Hungary	48.404	21.637	360	S	6
PI636060	Hungary	48.054	20.921	105	S	6
PI639299	Kazakhstan	43.377	77.077	670	S	2
PI639300	Kazakhstan	43.377	77.077	670	S	2
PI639344	Tajikistan	38.62	73.295	4986	S	6
PI639345	Tajikistan	38.621	73.296	5017	S	6
PI639346	Tajikistan	38.621	73.296	5017	S	6
PI639357	Tajikistan	38.621	73.296	5017	S	6
